# Supplementary material for: Mucosal-Associated Invariant T Cell Is a Potential Marker to Distinguish Fibromyalgia Syndrome from Arthritis
Source: PLoS One. 2015 Apr 8;10(4):e0121124. doi: 10.1371/journal.pone.0121124 (PMC4390316; doi:10.1371/journal.pone.0121124)
Supplement: S3 Table — Some samples are missing due to the rarity of MAIT cells. Cell surface antigens are categorized as shown. MFI for the indicated cell surface antigen is depicted. total MAIT cells, CD8+: CD8+ MAIT cells, DN: DN MAIT cells. (XLSX) [file pone.0121124.s003.xlsx]

## Sheet: Table S3
categories	antigens	statics	total MAIT					CD8+ MAIT					DN MAIT
			HD	FMS	RA	SpA		HD	FMS	RA	SpA		HD	FMS	RA	SpA
chemokine receptors	CCR4	Numbers	16	25	20	36		16	25	19	35		16	22	18	33
		Minimum	22.8	-8.04	5.06	-17.9		-4.15	-22.3	-22.3	-20.4		20.8	-22.3	-22.3	-22.3
		25% Percentile	42.8	8.4	26.38	20.58		32.95	7.105	22.6	20.3		27.55	-3.463	3.84	3.766
		Median	65.3	27.4	47.2	37.5		61.65	16.9	35.7	42.3		51.05	22.1	21.4	26.6
		75% Percentile	92.13	59.45	72.68	68.53		130	68.55	70	66.2		67.25	41.48	65.7	48.35
		Maximum	124	122	133	138		169	158	102	146		150	104	136	144
	CCR5	Numbers	16	25	21	36		16	25	21	36		15	25	20	32
		Minimum	51.2	48.3	24.4	51.9		61.6	36	-22.3	32.7		49.5	14.2	-0.814	-22.3
		25% Percentile	108	113	105.9	130		187.5	139.5	228	185.5		101	165	58.48	186
		Median	271	168	177	300		506	304	407	341		373	306	100.5	444
		75% Percentile	687.8	487.5	462	594.5		984.5	540	829.5	705		680	692	565	678
		Maximum	1308	958	916	1108		1517	1175	1244	1595		1551	1258	1534	1192
	CCR6	Numbers	16	25	21	35		16	25	21	35		15	21	21	32
		Minimum	13.4	0.551	-8.52	-4.51		13.7	-22.3	-8.52	-21.7		33.9	-1.07	-22.3	11
		25% Percentile	52.25	40.5	35.15	49.4		99.23	21.75	16.55	63.1		42.8	38.15	28.1	45.4
		Median	94.05	71.6	65.9	130		160.5	92.9	58.2	94.4		64.3	82.6	58.7	129
		75% Percentile	213.3	148	200.5	258		232.3	212	277.5	296		251	323.5	201	394.8
		Maximum	740	806	443	561		806	782	576	587		695	1031	772	772
	CCR7	Numbers	16	25	21	36		16	25	21	36		15	22	19	33
		Minimum	39	26	162	49.6		55.3	42	105	142		13.4	6.56	-22.3	9.81
		25% Percentile	95.73	215.5	492	584.3		428.5	910	1234	1251		25.5	23.35	33.9	38.65
		Median	163	888	867	1162		1041	2058	1961	1951		35.1	64.15	70.8	85.8
		75% Percentile	564	1932	2501	1786		1464	2609	3045	2910		62.6	111.5	154	138
		Maximum	3210	2359	3525	3719		2995	4434	4963	4449		93.9	256	1486	461
	CXCR1	Numbers	16	25	21	35		16	25	20	35		16	21	19	30
		Minimum	-2.54	-22.3	-22.3	-22.3		-22.3	-22.3	-14.7	-22.3		2.64	-22.3	-14.8	-22.3
		25% Percentile	7.878	-15.55	2.62	-6.23		4.313	-14	-7.278	-6.31		22.7	-20.7	11.8	-15.63
		Median	28.5	1.46	23	3.93		9.47	-4.82	14.3	2		45.7	-10.7	66.7	4.875
		75% Percentile	71.13	24.65	44.6	17.6		38.93	10.37	34.8	18		133.4	57.2	244	56.93
		Maximum	163	187	174	65.2		225	323	79.9	142		219	347	653	168
	CXCR3	Numbers	16	25	20	36		16	24	20	36		15	23	18	33
		Minimum	24.9	-4.69	-22.3	-22.3		5.31	-4.69	-22.3	-22.3		2.87	-22.3	-22.3	-22.3
		25% Percentile	41.23	35.55	48.9	29.08		158.5	93	109.3	60.78		18.6	-12.2	-7.885	-3.89
		Median	72.15	72.5	79.55	93.8		253.5	191.5	236	187.5		26.8	14.1	28.6	18
		75% Percentile	178.8	137.5	279	295.8		447.3	349.3	558.5	492		41.9	84.9	61.5	47.75
		Maximum	769	389	478	1034		769	1173	917	1301		77.7	668	291	99.9
	CXCR4	Numbers	16	25	21	35		16	25	21	35		15	24	17	31
		Minimum	34.2	-22.3	-9.01	-4.09		-22.3	-22.3	-9.01	-8.01		31.8	-22.3	-22.3	-6.19
		25% Percentile	74.33	16.03	52	224		62	14.6	95.1	627		62.5	-1.248	67.15	67.6
		Median	133.5	158	293	684		508	709	438	878		74.9	54.35	182	327
		75% Percentile	514.5	702.5	662	996		935.3	1177	893	1035		250	214	670.5	946
		Maximum	805	1483	1517	2572		1323	2170	2174	2412		833	2170	2977	3555
costimulators	CD27	Numbers	16	24	21	36		16	23	21	35		16	21	18	34
		Minimum	11.8	18.7	-22.3	-22.3		21.6	11	-22.3	-22.3		-22.3	31	-22.3	-22.3
		25% Percentile	39.18	93.53	50.75	61.63		54.28	208	76.5	88.5		26.88	47.45	36.15	31.78
		Median	133.8	253.5	128	175.5		330	324	223	209		52.4	204	62.15	109
		75% Percentile	587.5	663.5	394.5	328		882.5	652	587.5	443		153	892.5	264	357
		Maximum	976	1562	740	1653		1165	1887	1098	1695		1133	2344	671	2416
	CD28	Numbers	16	25	20	36		16	25	19	36		15	23	21	33
		Minimum	22.4	38.3	28.4	-22.3		-22.3	12.2	22.5	-22.3		18.4	-22.3	-22.3	6.5
		25% Percentile	71.33	94.6	61.5	136.3		73.78	119.5	96.6	112.8		48.7	41.7	29.05	49.65
		Median	362	340	254	488.5		639	413	323	639		97.3	467	154	457
		75% Percentile	1372	734.5	806.8	1151		1734	1161	930	1327		478	950	712.5	986
		Maximum	1752	1812	1092	2175		1981	2174	1501	2418		1528	1467	1687	1878
	ICOS	Numbers	16	25	21	36		16	25	21	36		16	22	18	31
		Minimum	28.2	8.23	-22.3	14.4		17.6	9.67	-22.3	-22.3		24.6	-22.3	6.33	-22.3
		25% Percentile	54.53	22.05	30.2	33.83		59.7	29.65	15.95	37.93		38.15	-7.94	23.43	19.5
		Median	79.15	53.9	51.7	64.55		73.15	60	58.3	65.1		56.45	44.45	40.15	55.1
		75% Percentile	92.35	120	108.5	136.3		115.3	126	112	120		65.4	66.18	93.05	83.4
		Maximum	170	415	235	437		417	415	203	437		317	373	261	321
cytokine receptors	CD127	Numbers	16	25	20	36		14	25	20	34		16	21	18	35
		Minimum	38.1	11.7	28.4	41.8		-22.3	-5.79	30.9	23.9		26.3	-22.3	-22.3	-22.3
		25% Percentile	68.23	95.1	60.43	150.5		50.93	76.85	75.88	164		45.9	78	43.6	163
		Median	148.1	199	393.5	491.5		393.5	281	410.5	466.5		135	281	100.3	432
		75% Percentile	615.8	559	620	818.3		805.3	525.5	784.8	840.3		564.3	757.5	452	692
		Maximum	1174	813	1090	1370		1206	983	1122	1535		1184	1715	2026	1515
	IL-18Ra	Numbers	16	25	21	36		16	25	21	36		16	24	20	33
		Minimum	83.7	29.3	25.3	15.3		48.4	33	29.9	15.3		54.3	8.07	42.8	23.2
		25% Percentile	110.8	119.5	94.4	101		107	112.5	148.5	79.55		159.5	158.3	217	178.5
		Median	222	185	216	183		231	160	322	151.5		282	271	292.5	353
		75% Percentile	687.5	440.5	536.5	522.3		808.8	457	567.5	557.8		656.5	429.8	456	558.5
		Maximum	1068	1034	871	933		1116	1034	1003	1012		939	720	796	1669
NK receptors	CD94	Numbers	16	25	21	36		16	24	21	35		15	21	17	30
		Minimum	11.9	-8.96	-2.1	-15.9		-22.3	-8.96	-2.1	-13.2		8.53	-22.3	-22.3	-22.3
		25% Percentile	41.95	6.97	37.4	2.763		42.63	14.2	23.05	-1.26		25.5	-13.55	15	-9.823
		Median	75.6	31.7	74	30.1		90.7	37.65	63.1	27.7		68.1	26.1	279	19.8
		75% Percentile	156.8	77.7	174.5	59.8		221.5	270.3	165.5	58		247	73.4	659	115
		Maximum	820	1344	701	606		820	1344	816	786		458	1065	931	418
	NKp80	Numbers	16	24	21	36		16	22	21	36		15	23	20	32
		Minimum	-22.3	-17.6	-22.3	-22.3		-22.3	-14.7	-22.3	-22.3		26.2	-22.3	-22.3	-22.3
		25% Percentile	21.3	-7.673	0.3465	-3.855		16.3	-11.65	-7.34	-3.018		35.7	-9.09	2.875	-12.33
		Median	34.25	4.14	23.9	11.5		30.35	-0.446	13.9	11.3		74.2	20.3	77.8	15.3
		75% Percentile	99.15	31.2	60.35	28.88		81.9	14.68	34.7	28.25		167	85.3	234.3	66.3
		Maximum	251	89.7	231	140		256	49.6	218	122		413	286	331	412
	NKG2D	Numbers	16	23	21	35		16	23	21	35		16	21	16	31
		Minimum	18.3	2.5	-7.82	-22.3		20.1	-0.484	-8.51	-22.3		15.7	-22.3	-22.3	-22.3
		25% Percentile	39.3	22.1	36.75	21		30.2	13.4	36.6	19.2		38.05	10.28	12.88	11.7
		Median	51.15	42.7	69	59		49.75	46.1	62	54.8		69.6	33.5	122	45.8
		75% Percentile	73.78	121	181	89.6		194.5	139	244	82.2		143	100.7	186.3	143
		Maximum	172	259	443	563		317	293	443	563		207	210	704	665
SLAM family	CD150	Numbers	16	25	21	36		16	25	21	34		14	19	18	34
		Minimum	-22.3	-22.3	-15.5	-22.3		-22.3	-22.3	-13.2	-22.3		21.4	-22.3	-1.61	-22.3
		25% Percentile	37.13	-0.6515	15.28	12.85		31.48	-3.855	15.28	9.585		33.7	0.24	16.63	19.7
		Median	50.5	11.3	33	30.65		87.65	9.8	33	29.15		50.4	23.7	32.55	34.35
		75% Percentile	89.9	38.7	46.65	66.38		118.8	23.05	58.9	50.45		90.73	64.5	61.58	94.48
		Maximum	147	152	66.3	167		171	152	116	192		149	124	101	254
	CD244	Numbers	16	24	21	36		16	24	21	35		15	22	19	34
		Minimum	136	16.4	66.4	-10.6		98.5	16.4	92.6	-8.96		226	27	57	-22.3
		25% Percentile	176.3	76.68	110	115.5		147.3	75.25	140.5	98.5		347	164.5	225	265.5
		Median	293.5	163	184	224.5		328	152	194	226		560	405.5	459	392
		75% Percentile	484.8	329.3	355.5	296.3		561.8	336.3	363.5	316		783	799.8	821	641.5
		Maximum	638	972	672	771		972	1092	595	849		1233	1157	1329	1130
activation	CD69	Numbers	15	12	15	26		15	12	15	26		14	12	14	23
		Minimum	23.7	-1.68	-1.89	-1.72		-7.51	-0.989	2.64	-0.71		23.7	-22.3	-22.3	-22.3
		25% Percentile	44.2	28.73	38.5	20.1		28.1	21.05	30	19.3		43.98	26.65	41.28	15.9
		Median	63.2	33.25	53.4	55.9		81.2	35.7	78.7	60.35		55.85	47.4	86.7	56.3
		75% Percentile	137	47.28	85	102.1		161	56.63	186	100.9		110.5	71.95	297.5	129
		Maximum	207	95.2	330	275		326	128	586	555		140	180	899	411
memomry	CD44	Numbers	15	12	15	22		12	8	8	19		14	10	11	15
		Minimum	1305	-12	4223	328		1060	-12.5	2903	-1.89		1046	6.07	1175	860
		25% Percentile	1868	1900	7396	3128		3127	4393	5520	5399		1889	135.5	1593	1508
		Median	4389	3430	10790	6690		12832	8878	12378	12933		3014	2222	3143	2764
		75% Percentile	12196	5291	14576	14228		17903	13701	16648	17683		7669	3818	8534	7111
		Maximum	21938	15585	16901	21600		22960	15332	18649	21600		21764	17483	16895	13838
Fas	CD95	Numbers	16	25	21	36		15	25	21	35		16	23	19	32
		Minimum	78.6	91.6	95.8	38.4		56.2	97.9	25.5	10.9		26.1	-22.3	75.1	-22.3
		25% Percentile	187.5	147	196.5	174.3		140	144.5	166	171		119.5	145	157	140.5
		Median	303	198	265	285.5		339	192	282	283		228.5	193	258	243.5
		75% Percentile	386.5	278.5	358	362.8		449	265	389	350		332.8	333	405	363.8
		Maximum	740	762	921	639		738	935	921	704		558	894	460	591
integrin family	CD18	Numbers	14	18	18	29		12	12	13	25		14	15	11	20
		Minimum	3459	1863	2659	369		3155	2782	3812	845		3210	1275	4674	1032
		25% Percentile	6275	4921	5872	6073		7832	3607	7473	6577		5274	5383	5804	6341
		Median	7431	7055	7510	7481		10766	7589	8318	8851		6962	6785	7004	7227
		75% Percentile	11349	8866	9364	10738		14631	11294	9855	12670		10636	9892	10753	10261
		Maximum	16859	15210	9963	18002		18124	18555	14133	20050		14995	13183	15000	24207
	CD49d	Numbers	16	25	20	36		16	23	20	36		15	23	18	32
		Minimum	216	106	162	25.5		261	110	166	26.2		155	60.7	64.2	-22.3
		25% Percentile	260.5	284	282.3	267.8		423.8	261	350	334.8		189	198	213.5	148.3
		Median	365.5	414	407.5	402		529	447	421.5	487.5		244	282	325	252.5
		75% Percentile	503.8	554	526.8	575.3		759.3	681	616.3	699.3		415	432	445.8	400.3
		Maximum	862	1120	1408	1244		919	913	1061	1364		625	814	794	970
relevant to MAIT cells	CD26	Numbers	16	25	20	36		16	24	20	36		15	23	18	33
		Minimum	-13.8	-22.3	4.83	12.6		-11	-22.3	0.577	-22.3		13.3	-22.3	-5.92	-22.3
		25% Percentile	131.8	113	38.05	125.8		68.38	124.8	41.78	69.63		77	147	44.2	122.5
		Median	265	666	305.5	520.5		725	381	609.5	1146		479	705	501.3	675
		75% Percentile	2626	1540	776.8	1665		3217	1796	2066	2653		3730	2541	1614	2024
		Maximum	6589	6219	3418	4893		7489	7123	4461	6196		6231	4884	6080	5001
	CD8b	Numbers	16	24	21	36		16	24	21	36		16	23	17	33
		Minimum	-5.18	-22.3	-19.7	-22.3		-9.45	-22.3	-22.3	-22.3		-22.3	-22.3	-22.3	-22.3
		25% Percentile	21.58	-17.95	-2.081	-13.55		49.55	-17.95	-0.0055	-13.85		6.033	-22.3	-14.25	-20.35
		Median	35	-0.17	30.5	21.9		89	10.63	84.3	58.9		21.25	-15.6	12	-6.95
		75% Percentile	60.23	24.75	59.85	55.63		125.3	63.1	136.5	88.13		33.8	18.5	30.6	24.75
		Maximum	139	215	117	92.8		197	287	359	384		59.7	47.9	60.2	159
immuno-regulatory molecule	CD73	Numbers	16	23	20	36		16	23	19	36		15	21	17	31
		Minimum	22.8	-22.3	-22.3	-22.3		-22.3	-22.3	-22.3	-22.3		3.5	-22.3	-22.3	-22.3
		25% Percentile	38.6	20.3	18.6	17.4		26.83	20.8	23.7	11.55		33.8	20.3	9.36	11.1
		Median	65.8	38.5	32.3	36		74.05	52.4	45.6	37.4		44.1	36.4	30.7	36.9
		75% Percentile	91.65	88.5	56.88	52.78		151.5	99	98.2	65.83		72	161.7	60.75	87.5
		Maximum	170	394	120	250		324	430	260	286		193	568	242	301
miscellaneous	CD2	Numbers	15	22	17	35		14	22	16	35		14	20	16	26
		Minimum	323	178	197	-22.3		157	-1.51	305	-22.3		402	84.9	140	25.5
		25% Percentile	2109	1562	1633	2156		3692	2718	3341	2354		1257	732.5	898	1327
		Median	3001	2798	3306	3945		5106	3899	4149	3945		2136	1941	1930	3551
		75% Percentile	7069	4073	5394	4858		7181	5242	6553	5810		6775	3759	4177	5278
		Maximum	8060	7637	8906	10008		9204	7266	8906	9706		8167	10973	7809	10939
	CD99	Numbers	16	24	20	34		15	23	20	34		16	22	17	30
		Minimum	219	456	142	44.5		574	470	904	44.5		114	134	153	113
		25% Percentile	688	996.3	950.5	743.8		1407	1389	1392	1099		342.8	381.3	568.5	555.5
		Median	1035	1150	1627	1559		1870	1816	2250	1922		551.5	884.5	1063	1171
		75% Percentile	2233	1959	2830	2275		2554	2252	2826	2442		1272	2022	2276	2096
		Maximum	2961	3240	4013	3183		3379	4809	4485	3101		2535	3481	4856	3322
degranulation	CD107a	Numbers	16	24	20	36		15	24	20	35		15	19	18	33
		Minimum	22.5	-15.9	1.87	-22.3		-22.3	-22.3	-16.5	-22.3		-5.22	-22.3	-3.43	-22.3
		25% Percentile	26.23	7.903	11.25	10.09		18.3	4.238	5.635	9.28		37.8	-14.3	14.6	-2.117
		Median	40.8	33.8	28.7	26.65		45.5	25.2	25.85	22.1		72.7	27.5	45.65	20.5
		75% Percentile	77.77	61.03	52.95	45.18		101	46.45	60.38	42.7		92.1	64.9	98.08	52.15
		Maximum	153	203	73.7	101		162	160	163	111		172	267	200	129
